## Induction of branchial ion transporter mRNA expression during acclimation to salinity change in the euryhaline crab *Chasmagnathus granulatus*

Carlos M. Luquet<sup>1,2,\*</sup>, Dirk Weihrauch<sup>3</sup>, Mihaela Senek<sup>4</sup> and David W. Towle<sup>5,†</sup>

<sup>1</sup>Departamento de Biodiversidad y Biología Experimental, Facultad de Ciencias Exactas y Naturales, Universidad de Buenos Aires, Pab. II, Ciudad Universitaria, C1428EHA Buenos Aires, Argentina, <sup>2</sup>CONICET (Consejo Nacional de Investigaciones Científicas y Técnicas), Rivadavia 1917, C1033AAJ Buenos Aires, Argentina, <sup>3</sup>Department of Animal Physiology, University of Osnabrueck, 49076 Osnabrueck, Germany, <sup>4</sup>College of the Atlantic, Bar Harbor, ME 04609, USA and <sup>5</sup>Mount Desert Island Biological Laboratory, Salsbury Cove, ME 04672, USA

\*Present address: AUSMA-COMAHUE, Pasaje de la Paz 235, San Martín de los Andes, 8370 Neuquén, Argentina

†Author for correspondence (e-mail: dtowle@mdibl.org)

Accepted 1 August 2005

### Summary

Using quantitative real-time PCR, the expression of mRNAs encoding three transport-related proteins and one putative housekeeping protein was analyzed in anterior and posterior gills of the euryhaline crab *Chasmagnathus granulatus* following transfer from isosmotic conditions (30‰ salinity) to either dilute (2‰) or concentrated (45‰) seawater. Modest changes were observed in the abundance of mRNAs encoding the housekeeping protein arginine kinase and the vacuolar-type H<sup>+</sup>-ATPase B-subunit, both of which were highly expressed under all conditions. By contrast, the expression of Na<sup>+</sup>/K<sup>+</sup>-ATPase  $\alpha$ -subunit mRNA and Na<sup>+</sup>/K<sup>+</sup>/2Cl<sup>-</sup> cotransporter mRNA was strongly responsive to external salinity. During acclimation to dilute seawater, cotransporter mRNA

increased 10–20-fold in posterior gills within the first 24 h while Na<sup>+</sup>/K<sup>+</sup>-ATPase  $\alpha$ -subunit mRNA increased 35–55-fold. During acclimation to concentrated seawater, cotransporter mRNA increased 60-fold by 96 h and Na<sup>+</sup>/K<sup>+</sup>-ATPase  $\alpha$ -subunit increased approximately 25-fold in posterior gills. Our results indicate a complex pattern of transcriptional regulation dependent upon the direction of salinity change and the developmental background of the gills.

Key words: Na<sup>+</sup>/K<sup>+</sup>-ATPase, Na<sup>+</sup>/K<sup>+</sup>/2Cl<sup>-</sup> cotransporter, V-type H<sup>+</sup>-ATPase, arginine kinase, crab, gill, gene expression, quantitative PCR.

### Introduction

Physiological mechanisms by which euryhaline organisms adapt to changing salinities remain largely unexplored at the molecular level, particularly regarding the regulation of gene expression. The organism selected for the present studies, the semi-terrestrial euryhaline crab *Chasmagnathus granulatus*, is found in abundance along estuaries of the Atlantic coast of Brazil, Uruguay and Argentina, where it faces rapid changes of environmental salinity due to rains and tides. Adults of this species strongly hyper-osmoregulate in salinities less than normal seawater (35‰) and hypo-osmoregulate effectively in salinities more concentrated than seawater (Charmantier et al., 2002; Luquet et al., 1992). For example, following transfer from 35 to 10‰ seawater, hemolymph osmolality of *C. granulatus* declined only about 20%, primarily due to controlling the loss of [Na<sup>+</sup>] and [Cl<sup>-</sup>] (Schleich et al., 2001). This strong osmoregulatory response to salinity dilution suggests the presence of effective NaCl uptake and retention mechanisms, processes that are believed to occur primarily across posterior gills (Lucu, 1993; Péqueux, 1995; Taylor and

Taylor, 1992; Towle and Weihrauch, 2001). Conversely, hypo-osmoregulation in concentrated seawater indicates an ability to excrete NaCl across the gill epithelium against an osmotic gradient, through mechanisms that are not well understood for crustacean species.

Ultrastructural studies of *C. granulatus* gills show that a morphology characteristic of ion-transporting cells predominates in posterior gills (Luquet et al., 2000). Within 25 days following transfer from seawater to 12‰ salinity, the depth of septate junctions between epithelial cells in posterior gills increased significantly, suggesting that the gill epithelium is less permeable in reduced salinity (Luquet et al., 2002a). In addition, the abundance of the ion-transporting cell type increased, notably through a process of differentiation and specialization rather than proliferation of cells (Genovese et al., 2000). Following transfer to concentrated seawater, the sub-apical space expanded and septate junction depth was even less than that in normal seawater (Luquet et al., 2002a), indicating further specialization for hypo-osmoregulation.

Superimposed upon these long-term changes in morphology are likely to be short-term changes in the function and/or expression of transport systems within the gill epithelium, controlled by hormonal processes or by direct response to osmotic changes. Indeed, we have shown that alteration of the osmotic concentration of perfusion media leads rapidly to adaptive changes in the transport capacity of isolated posterior gills of *C. granulatus* (Tresguerres et al., 2003). Furthermore, dopamine administration to isolated gills results in rapid changes in transport as well, probably acting through two different receptors, one activating and one inhibitory (Halperin et al., 2004).

Possible targets of these regulatory processes have been tentatively identified through an analysis of the transport properties of isolated split-gill lamellae mounted in Ussing-type chambers (Onken et al., 2003). Ion substitution and inhibitor application strongly supported a significant role of basolateral  $\text{Na}^+/\text{K}^+$ -ATPase in hyper-osmoregulatory ion uptake in *C. granulatus*, confirming related studies in this (Genovese et al., 2004) and several other crab species (Burnett and Towle, 1990; Lucu and Towle, 2003; Towle and Kays, 1986). In addition, experiments with split gill lamellae pointed toward possible roles in ion uptake for an apical  $\text{Na}^+/\text{H}^+$  exchanger,  $\text{Na}^+/\text{K}^+/\text{2Cl}^-$  cotransporter and  $\text{Cl}^-/\text{HCO}_3^-$  exchanger, as well as intracellular carbonic anhydrase (Onken et al., 2003), in line with other models of NaCl absorption across crustacean gill (Lucu, 1993; Onken and Riestenpatt, 1998; Towle and Weihrauch, 2001). In addition, recent experiments support a role for the V-type  $\text{H}^+$ -ATPase in energizing  $\text{Cl}^-$  uptake across *C. granulatus* gills (G. Genovese and C. M. Luquet, unpublished).

However, very little is known about possible mechanisms of NaCl excretion resulting in hypo-osmoregulation. A study of the hyper-/hypo-osmoregulating mangrove crab *Ucides cordatus* identified differences between individual gills in their capacity for ion absorption *versus* ion excretion (Martinez et al., 1998), suggesting that the molecular machinery implementing absorption and excretion is functionally unique. By contrast, Luquet et al. (2002b) have recorded similar ouabain-sensitive potential differences in the three posterior gills of *C. granulatus*. Although models for ion excretion across fish gills are quite well accepted (Evans, 2002; Perry, 1997), no similar conceptual basis exists for hypo-osmoregulating crustaceans.

To further elucidate the molecular physiology of bidirectional ion transport across gills of a strongly euryhaline crab, we sought to identify and characterize the expression of candidate transporter genes in 30‰-acclimated *C. granulatus* transferred for varying lengths of time to dilute (2‰) or concentrated (45‰) seawater, hypothesizing that transporters playing an essential role in hyper- or hypo-osmoregulation might be upregulated *via* transcriptional induction. Several candidate transporters in osmoregulatory tissues of euryhaline crustaceans have been identified and characterized at the molecular level, including the  $\text{Na}^+/\text{H}^+$  exchanger (Towle et al., 1997a),  $\text{Na}^+/\text{K}^+$ -ATPase  $\alpha$ -subunit (Towle et al., 2001), V-type  $\text{H}^+$ -ATPase B-subunit

(Weihrauch et al., 2001) and  $\text{Na}^+/\text{K}^+/\text{2Cl}^-$  cotransporter (Towle et al., 1997b). In the present study, we used quantitative polymerase chain reaction (QPCR) techniques to analyze mRNA transcript abundance for the latter three transporters in gills of *C. granulatus* challenged by salinity change, to determine if transcriptional expression of transporter-encoding genes is altered in response to salinity stress. A predicted housekeeping mRNA, that coding for arginine kinase (Kotlyar et al., 2000), was used as a reference transcript.

### Materials and methods

Adult male specimens in intermolt stage C (Drach and Tchernigovtzeff, 1967) of the South American rainbow crab, *Chasmagnathus granulatus* (deHaan 1835), were caught by net at Punta Rasa Beach, San Clemente del Tuyú, Buenos Aires Province, Argentina. Crabs were kept at  $20\pm 1^\circ\text{C}$  with a 12 h:12 h L:D photoperiod in aerated artificial seawater of 30‰. Crabs were fed twice a week with pellets of rabbit food, and the water was changed the following day.

For salinity acclimation experiments, animals were transferred from 30‰ seawater, in which the hemolymph is essentially isosmotic to the medium (Luquet et al., 1992), to salinities of either 2‰ or 45‰. Crabs were rapidly sacrificed at timed intervals following the transfer. After removing the dorsal carapace, gill pairs 3–8 were excised at their base and placed into RNase-free vials containing a large excess of RNAlater (Ambion, Austin, TX, USA) to inactivate endogenous RNases in the gill tissue. Tissues in RNAlater were stored at  $-20^\circ\text{C}$  until air transport to Mount Desert Island Biological Laboratory, where they were returned to  $-20^\circ\text{C}$ .

Total RNA was prepared by pooling the gills of each pair from four animals (Chomczynski and Sacchi, 1987) using RNase-free disposable labware with the RNAGents Total RNA kit (Promega, Madison, WI, USA). RNA quality and quantity were determined by microfluidic electrophoresis with the RNA 6000 Nano Assay system and 2100 Bioanalyzer (Agilent, Waldbronn, Germany). Ribosomal RNA produced three sharp peaks (one 18S rRNA and two 28S fragments) characteristic of crustacean and other arthropod species (Skinner, 1968).

cDNA was reverse transcribed from mRNA in 2.0  $\mu\text{g}$  of total RNA using SuperScript II reverse transcriptase (Invitrogen, Carlsbad, CA, USA) and oligo-dT as primer. Degenerate oligonucleotide primers for the polymerase chain reaction were based on conserved regions identified by multiple alignments of target amino acid sequences from other species and were synthesized by Integrated DNA Technologies (Coralville, IA, USA) (Table 1). Target cDNAs were those encoding arginine kinase, a putative housekeeping gene (Kotlyar et al., 2000), plus candidate ion transporters V-type  $\text{H}^+$ -ATPase (B-subunit),  $\text{Na}^+/\text{K}^+/\text{2Cl}^-$  cotransporter and  $\text{Na}^+/\text{K}^+$ -ATPase ( $\alpha$ -subunit). Conventional PCR was performed at an annealing temperature of  $45^\circ\text{C}$  using RedTaq polymerase (Sigma, St Louis, MO, USA), and amplification products were isolated electrophoretically on 0.8% agarose gels in TBE buffer.

Table 1. Nucleotide sequence of degenerate and non-degenerate primers used for conventional and quantitative PCR amplification of arginine kinase, V-type H<sup>+</sup>-ATPase B-subunit, Na<sup>+</sup>/K<sup>+</sup>/2Cl<sup>-</sup> cotransporter, and Na<sup>+</sup>/K<sup>+</sup>-ATPase  $\alpha$ -subunit cDNAs from gills of *Chasmagnathus granulatus*

| Name                                                      | Sequence (5'→3')            | Target cDNA                                                     |
|-----------------------------------------------------------|-----------------------------|-----------------------------------------------------------------|
| Primers used in initial amplification by conventional PCR |                             |                                                                 |
| AKF51                                                     | CGC TGA GTC TAA GAA GGG ATT | Arginine kinase                                                 |
| AKR31                                                     | GAT ACC GTC CTG CAT CTC CTT |                                                                 |
| HATF2                                                     | GCN ATG GGN GTN AAY ATG GA  | V-type H <sup>+</sup> -ATPase B-subunit                         |
| HATR4                                                     | TGN GTD ATR TCR TCG TTN GG  |                                                                 |
| COTFX                                                     | TNA AYA THT GGG GNG TNA TG  | Na <sup>+</sup> /K <sup>+</sup> /2Cl <sup>-</sup> cotransporter |
| COTRX                                                     | CCR TCR TCR TAN ARC CAC CA  |                                                                 |
| NAK10F                                                    | ATG ACI GTI GCI CAY ATG TGG | Na <sup>+</sup> /K <sup>+</sup> -ATPase $\alpha$ -subunit       |
| NAK16R                                                    | GGR TGR TCI CCI GTI ACC AT  |                                                                 |
| Species-specific primers used in quantitative PCR         |                             |                                                                 |
| CgAKF1                                                    | GTT TCA AGC AGA CCG ACA AG  | Arginine kinase                                                 |
| CgAKR2                                                    | CTT CGT TGC ACC ATA CCA G   |                                                                 |
| CgHATF1                                                   | CCG ATT CTT CAA GCA GGA C   | V-type H <sup>+</sup> -ATPase B-subunit                         |
| CgHATR2                                                   | AAC CAG GGA AAC CAC GAC     |                                                                 |
| CgCOTF1                                                   | TGG CTC GCA GAT TGA CTT     | Na <sup>+</sup> /K <sup>+</sup> /2Cl <sup>-</sup> cotransporter |
| CgCOTR2                                                   | TGA AGC ATC CCT CAG TGT AA  |                                                                 |
| CgNAKF1                                                   | TCC CTT CAA CTC CAC CAA     | Na <sup>+</sup> /K <sup>+</sup> -ATPase $\alpha$ -subunit       |
| CgNAKR2                                                   | ATA CCA GCA GAA CGG CAC     |                                                                 |

D=A/G/T; H=A/C/T; I=A/C/G/T; N=A/C/G/T; R=A/G; Y=C/T.

Following gel extraction (Qiagen, Valencia, CA, USA), amplification products were sequenced on an ABI 3100 automated sequencer (Applied Biosystems, Foster City, CA, USA) at the Marine DNA Sequencing and Analysis Center at the Mount Desert Island Biological Laboratory. Raw sequence traces were analyzed and trimmed using Chromas software (<http://www.technelysium.com.au/chromas.html>) and were submitted to BLASTX analysis for tentative functional identification (Altschul et al., 1997). Species-specific primers based on the resulting sequences were designed with Primer Premier software (Premier Biosoft, Palo Alto, CA, USA) (Table 1). Open reading frames were identified, and nucleotide sequences were translated to their most likely amino acid sequences using DNASIS software (Molecular Biology Insights, Cascade, CO, USA). Multiple alignments were generated with Multalin (Corpet, 1988) and GeneDoc software (<http://www.psc.edu/biomed/genedoc>).

QPCR was accomplished with species-specific primers (Table 1) at an annealing temperature of 55°C on a Stratagene MX4000 real-time sequence detection instrument, using reagents in the Brilliant SYBR Green QPCR kit (Stratagene, LaJolla, CA, USA). mRNA expression levels were measured in triplicate samples of cDNA reverse transcribed from 0.10  $\mu$ g total RNA, thus normalizing to total RNA levels in each preparation, an accepted method of normalization for gene expression studies (Bustin, 2002). Relative mRNA abundance was calculated by comparison to a dilution series of a selected reference cDNA (usually gill 6 from 30‰-acclimated animals). Means of relative expression values for anterior gills 3, 4 and 5 and posterior gills 6, 7 and 8 were pooled for calculation of overall anterior and posterior gill means and

standard errors. Differences in relative abundance were compared by two-way analysis of variance (ANOVA) and *post hoc* comparisons, taking sampling time and gill group (anterior vs posterior) as factors.

## Results

Conventional PCR using degenerate primers produced single amplification products for each target transporter and housekeeping transcript, starting with cDNA prepared from posterior gills of *C. granulatus* (Fig. 1). The nucleotide sequences of these amplification products were translated to open reading frames that yielded high-scoring BLASTX matches to known sequences in GenBank, corresponding to each target transporter or housekeeping transcript (Fig. 2). Alignment of the amino acid sequences from *C. granulatus* with sequences from a selection of other species revealed conserved regions likely to be essential for protein function (Fig. 3).

Following transfer of crabs from 30‰ seawater to a dilute salinity of 2‰, a condition in which *C. granulatus* is a strong hyper-osmoregulator, QPCR analysis showed that mRNA encoding a presumed housekeeping gene, arginine kinase (Kotlyar et al., 2000), increased in abundance by 3–4-fold both in anterior and posterior gills, beginning at 24 h following the transfer ( $P < 0.0001$ ,  $N = 3$ ) (Fig. 4A). The relative abundance of arginine kinase mRNA was significantly higher in posterior gills.

V-type H<sup>+</sup>-ATPase B-subunit mRNA levels were 5–8-fold higher in all gills at 24 h following transfer to dilute salinity ( $P < 0.001$ ,  $N = 3$ ). After 8 days in 2‰, V-type H<sup>+</sup>-ATPase

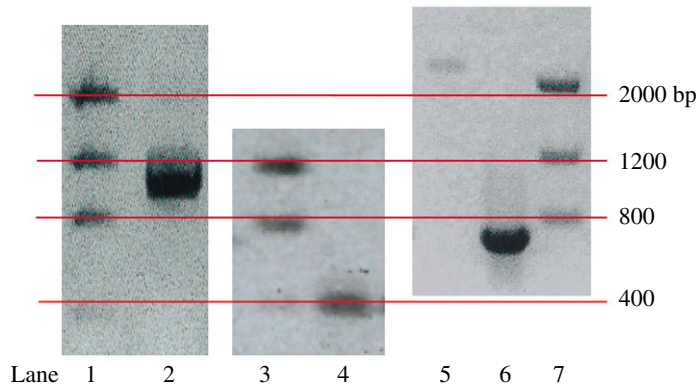

Fig. 1. Amplification of target transporter and housekeeping cDNAs from *Chasmagnathus granulatus* gill by conventional PCR. Expected sizes of amplification products are indicated in parentheses: lane 1, DNA ladder; lane 2, arginine kinase (1088 bp); lane 3, DNA ladder; lane 4, V-type H<sup>+</sup>-ATPase B-subunit (390 bp); lane 5, Na<sup>+</sup>/K<sup>+</sup>/2Cl<sup>-</sup> cotransporter (2100 bp); lane 6, Na<sup>+</sup>/K<sup>+</sup>-ATPase  $\alpha$ -subunit (703 bp); lane 7, DNA ladder. Sizes of ladder standards are indicated at the right; each gel image was adjusted to give parallel ladder bands.

mRNA levels in both anterior and posterior gills were about 4-fold higher than the 30‰ controls (Fig. 4B). There were no significant differences between anterior and posterior gills. It should be noted that mRNAs encoding arginine kinase and the V-type H<sup>+</sup>-ATPase B-subunit were highly expressed under all conditions, relative to the Na<sup>+</sup>/K<sup>+</sup>/2Cl<sup>-</sup> cotransporter and Na<sup>+</sup>/K<sup>+</sup>-ATPase  $\alpha$ -subunit (Table 2), and thus may represent transcripts that are primarily constitutively expressed.

By contrast, the expression of Na<sup>+</sup>/K<sup>+</sup>/2Cl<sup>-</sup> cotransporter transcripts increased 10–22-fold in posterior gills by 24 h of exposure to 2‰ salinity ( $P < 0.001$ ,  $N = 3$ ), with more modest increases in anterior gills ( $P < 0.05$  between gill groups) (Fig. 4C). The large standard error noted at 48 h for posterior gills reflects the disparate responses of the three gills to salinity reduction at that time. Gill 7 contained very high levels of cotransporter mRNA at 48 h, while gill 8 showed little change from the previous time sample. However, by 96 h, differences between posterior gills were smaller, and a 10-fold increase in expression relative to 30‰ controls was maintained through the 8-day time sample.

Within 6 h after transfer to low salinity, Na<sup>+</sup>/K<sup>+</sup>-ATPase  $\alpha$ -subunit transcripts increased ~5-fold in the three posterior gills but remained unchanged in anterior gills. However, by 24 h after the transfer to 2‰ salinity,  $\alpha$ -subunit mRNA levels in all tested gills increased between 20- and 50-fold ( $P < 0.001$ ,  $N = 3$ ), with anterior gills declining by 96 h but posterior gills remaining high ( $P < 0.001$  between groups) (Fig. 4D).

Following transfer of crabs from 30‰ to 45‰ seawater, a condition in which *C. granulatus* is a strong hypo-osmoregulator, transporter and housekeeping transcript levels showed little change until 96 h after the transfer (Fig. 5). At that time, major increases in mRNA abundance for all four target genes occurred, primarily in posterior gills 6 and 7. The degree of change in posterior gills was 2–3-fold for arginine

kinase ( $P < 0.0001$  for time;  $P < 0.05$  between gill groups), 10-fold for V-type H<sup>+</sup>-ATPase B-subunit ( $P < 0.0001$  for time; no significant differences between groups), 60-fold for Na<sup>+</sup>/K<sup>+</sup>/2Cl<sup>-</sup> cotransporter ( $P < 0.0001$  for time;  $P < 0.005$  between groups), and 28-fold for Na<sup>+</sup>/K<sup>+</sup>-ATPase  $\alpha$ -subunit ( $P < 0.001$  for time;  $P < 0.05$  between groups) (Fig. 5A–D). After 8 days, the expression of all transcripts was similarly high in the three posterior gills and significantly higher than in anterior gills for Na<sup>+</sup>/K<sup>+</sup>/2Cl<sup>-</sup> cotransporter, Na<sup>+</sup>/K<sup>+</sup>-ATPase  $\alpha$ -subunit and arginine kinase but not for V-type H<sup>+</sup>-ATPase B-subunit.

## Discussion

Our results using quantitative PCR clearly show that gills of *Chasmagnathus granulatus* respond to salinity change by inducing the synthesis and/or retention of messenger RNAs encoding at least two of the three candidate ion transporters, namely Na<sup>+</sup>/K<sup>+</sup>/2Cl<sup>-</sup> cotransporter and Na<sup>+</sup>/K<sup>+</sup>-ATPase  $\alpha$ -subunit. The degree of change in mRNA expression from isosmotic conditions (30‰ salinity) to either 2‰ or 45‰ for these two transporters is substantially larger than changes in expression observed for either the putative housekeeping gene arginine kinase or the third candidate transporter V-type H<sup>+</sup>-ATPase (B-subunit). Both of these mRNAs are highly expressed in gills compared with the cotransporter and Na<sup>+</sup>/K<sup>+</sup>-ATPase  $\alpha$ -subunit and may represent constitutive genes that do not respond strongly to salinity stress but are required for other branchial functions. The V-type H<sup>+</sup>-ATPase, for example, is thought to play an important role in ammonia excretion across the gill (Weihrauch et al., 2002, 2004), a function that is likely to be at least partly independent of environmental salinity. Arginine kinase, catalyzing the phosphorylation of ADP to ATP at the expense of phosphoarginine, is believed to play an essential role in maintaining intracellular ATP concentrations (Ellington, 2001) required for most cellular activity. The transcription and retention of arginine kinase-encoding mRNA would thus be expected to remain robust under most environmental conditions requiring energy expenditure.

The Na<sup>+</sup>/K<sup>+</sup>/2Cl<sup>-</sup> cotransporter occurs in two major forms in vertebrate epithelial cells, an apical form involved in NaCl uptake and a basolateral form involved in NaCl excretion (Mount et al., 1998). Ion substitution experiments in split gill lamellae of *Carcinus maenas* support the existence of an apical Na<sup>+</sup>/K<sup>+</sup>/2Cl<sup>-</sup> cotransporter in this species (Riessenpatt et al., 1996). Previous molecular cloning experiments showed that a Na<sup>+</sup>/K<sup>+</sup>/2Cl<sup>-</sup> cotransporter is expressed in gills of crustacean species, including *C. granulatus* (Luquet et al., 2003; Towle and Peppin, 2002), but the resulting sequence information was insufficient to classify the product as apical or basolateral. The apparent induction of Na<sup>+</sup>/K<sup>+</sup>/2Cl<sup>-</sup> cotransporter mRNA accumulation in gills of *C. granulatus* transferred from 30‰ to 2‰ salinity suggests that an apical form may be induced in 2‰, where it could function in NaCl uptake from the medium. On the other hand, an even stronger apparent induction in 45‰, a condition in which the crab is excreting NaCl most likely *via* the gills, suggests recruitment of a basolateral

**A** Arginine kinase (AF233357)

1 CGC CAA GAG TCT CCA CAG AAC ACA AGA ATG GCT GAC GCT GCT ACC ATT 48  
 1 N M E T A R F F K Q D F E E N G 16  
 49 GCC AAG TTG GAT GAG GGC TTC AAG AAG CTG GAG GCC GCC ACC GAC TGC 96  
 8 A K L D E G F K K L E A A T D C 23  
 97 AAG TCC CTC CTG AAG AAA TAC ACC AAG GAT GTG TTC GAA CAG CTC 144  
 24 K S L L K K Y L T K D V F E Q L 39  
 145 AAG GCC AAG AAG ACC AAG CTT GGC GCC ACC CTC CTC GAT GTG ATC CAG 192  
 40 K A K K T K L G A T L L D V I Q 55  
 193 TCC GGT GTG GAG AAC CTG GAC TCT GGC GTC GGT GTG TAT GCC CCT GAT 240  
 56 S G V E N L G D S G V G V Y A P D 71  
 241 GCC GAG GCC TAC ACC CTC TFC TCC PCA CTC TTC GAC CCC ATC ATC GAG 288  
 72 A E A Y T L F I N V D P D P I I E 87  
 289 GAC TAC CAC AAG GGT TTC AAG CAG ACC GAC AAG CAC CCC AAC AAG GAC 336  
 88 D Y H K G F K Q T D K H P N K D 103  
 337 TTC GGC GAT GTC AGC CAG TTC ATT AAT GTG GAC CCC GAT GGC AAG TTC 384  
 104 F G D V S Q F I N V D P D G K F 119  
 385 GTC ATC TCC ACC CGC GTG CGT TGC GGC CGA TCC ATG GAG GGC TAC CCC 432  
 120 V I S T R V R C G R S M E G Y P 135  
 433 TTC AAC CCC TGC CTC ACC GAG GCC CAG TAC AAG GAG ATG GAG TCC AAG 480  
 136 F N P C L T E A G C A G D P D G E S K 151  
 481 GTC TCC TCC ACC CTG TCC AAC CTC GAG GGT GAG CTC AAG GGT ACC TAC 528  
 152 V S S T L S N L E G E L K G T Y 167  
 529 TTC CCC CTC ACT GGC ATG ACC AAG GAG GTC CAG CAG AAG CTG ATC GAC 576  
 168 F P L T G M T K E E V Q Q K L I D 183  
 577 GAT CAC TTC CTC TTC AAG GAG GGT GAC CGC TTC CTG CAG GCT GCC AAT 624  
 184 D H F L F K E G D R F L Q A A N 199  
 625 GCC TGC CGC TAC TGG CCC ACT GGC CGT GGC ATC TAC CAC AAC GAC AAC 672  
 200 A C R Y W P T G R G I Y H N D N 215  
 673 AAG ACC TTC CTG GTA TGG TGC AAC GAA GAG GAT CAC CTC CGA ATC ATC 720  
 216 K T F L V W C N E E D H L R I I 231  
 721 TCC ATG CAG ATG GGC GGT GAC CTG GGC CAG GTA TAC CGC CGC CTC GTC 768  
 232 S M Q M G G D L G Q V Y R R L V 247  
 769 ACC GCA GTC AAC GAT ATT GAG AAG CGT GTC CCC TTC TCT CAC CAT GAC 816  
 248 T A V N D I E K R V P F S H H D 263  
 817 CGC CTG GGC TTC CTC ACC TTC TGC CCC ACC AAC CTC GGC ACC ACC GTG 864  
 264 R L G F L T F C P T N L G T T V 279  
 865 CGT GCC TCC GTC CAC ATC AAG CTG CCC AAG CTG GCC GCC AAC CGC GAG 912  
 280 R A S V H I K L P A A N R E 295  
 913 AAG CTC GAG GAG GTC GCT GGC AGG TAC AGC CTC CAG GTC CGT GGC ACC 960  
 296 K L E E V A G R Y S L Q V R G T 311  
 961 CGC GGC GAG CAC ACC GAG GGC GGC ATC TAC GAC ATC TCC AAC 1008  
 312 R G E H T E A E G G I Y D I S N 327  
 1009 AAG CGC CGC ATG GGT CTC ACT GAG TTC CAG GCT GTC AAG GAG ATG CAG 1056  
 328 K R R M G L T E F Q A V K E M Q 343  
 1057 GAC GGT ATC CTT GAG CTC ATC AAG ATC GAG AAG GAG ATG CAG TAA AGT 1104  
 344 D G I L E L I K I E K E M Q \* 358  
 1105 TCG GCT CCA CTC TCT ATG GGT GAG GGC GAG CCG GGC TCT GCT GCG GAA 1152  
 1153 GGG TGC GCC CAC CCT GGA CCC GGG GCC CAG GAG TTG GCG CTG GAT AGG 1200  
 1201 CAG AC 1205

**B** V-type H<sup>+</sup>-ATPase B-subunit (AF189783)

1 AAC ATG GAA ACC GCC CGA TTC TTC AAG CAG GAC TTT GAG GAG AAT GGC 48  
 1 N M E T A R F F K Q D F E E N G 16  
 49 TCC ATG GAG AAC GTG TGC CTC TFC CTG AAC CTG GCC AAT GAC CCC ACC 96  
 17 S M E N V C L F L N L A N D P T 32  
 97 ATT GAA CGT ATC ATC ACC CCC CGC CTT GCC CTC ACC ACC GCA GAG TAC 144  
 33 I E R I I T P R L A L T T A E Y 48  
 145 CTC GCC TAC CAG TGC GAG AAG CAC GTC CTC ATC ATC CTC ACA GAC ATG 192  
 49 L A Y Q C E E K H V L I I L T D M 64  
 193 TCT TCC TAC GCC GAG GCT CTT CGT GAG GTG TCT GCT GCC CGA GAG GAG 240  
 65 S S Y A E A L R E V S A A R E E 80  
 241 GTG CCC GGC CGT CGT GGT TTC CCT GGT TAC ATG TAC ACC GAT TLG GCC 288  
 81 V P G R R G F P G V Y T D L A 96  
 289 ACC ATC TAC GAG CGT GCC GGC AGG GTG GAG GGC CGA TCG GGC TCC ATC 336  
 97 T I Y E R A G R V E G R S G S I 112  
 337 ACA CAG ATC CCC ATC CTT ACC ATG CCC AAC GAC GAC ATT AC 377  
 113 T Q I P I L T M P N D D I 125

**C** Na<sup>+</sup>/K<sup>+</sup>/2Cl<sup>-</sup> cotransporter (AF548368)

1 T CCT CAG GTG TCC TGG GTG GTC GGT CAA TCC GGA ATC ATC CTG GCC 46  
 1 P Q V S W V V G Q S G I I L A 15  
 47 CTC GTG ACG GTC CTG CTG GGG AAC CTG GTC ACC ACC ATC ACA ACC TTG 94  
 16 L V T V L L G N L V L T I T T L 31  
 95 TCC ATG TCC GCT GTG GCC ACC AAT GGG CGC ATC CAA GCT GGT GGC GTT 142  
 32 S M S A V A T N G R I Q A G G V 47  
 143 TAC TAC ATG ATC TCC CGC TCC CTT GGG CCT GAG TTC GGT GGC TCC ATC 190  
 48 Y Y M I S R S L G P E F G G S I 63  
 191 GGC CTC ATG TTC ACG CTG GCC AAC TCC ATC GCC TCA GCC ACC TAC ATC 238  
 64 G L M F T L A N S I A S A T Y I 79  
 239 ATC GGT TTC TGC GAC TCC CTG AAG GAT CTG CTG AAG TAC TAC GCT GAC 286  
 80 I G F C D S L K D L L K Y Y A D 95  
 287 GGT GCT CAG ATA GTG GAC GGG GGT CTG AAC GAC ACG CGC ATT GTA GGC 334  
 96 G A Q I V D G G L N D T R I V G 111  
 335 ACC GTC ACC CTC ATC TGT GTG CTG GCC CTG GAT ATC GTG GGC ATG GAC 382  
 112 T V T L I C V L A L A I V G M D 127  
 383 TGG GTC ACG AGG GTT CAA ATG GCT CTG CTG TTC CTG CTG ATT GGC TCG 430  
 128 W V T R V Q M A L F L L I G S 143  
 431 CAG ATT GAC TTC GTG GTT GGT GCC TTC ATG GGT CCA CTA GAT GAC GAA 478  
 144 Q I D F V V G A F M G P L D D E 159  
 479 CAG GAG GCC CAA GGA TTC CTT GGC TTC AAT GGC AAT GTG TTG TCA GAC 526  
 160 Q E A Q G F L G F N G N V T S D 175  
 527 AAT GTG GGT CCA GAT TAT CGA GAT AAT GAT GGC ATG AGT CAG AAC TTC 574  
 176 N V G P D Y R D N D G M S Q N F 191  
 575 TTC TCG GTG TTT GGT GTG TTC TFC ACA GCT ATG ACA GGC ATT GTG GCT 622  
 192 F V F G V F T T C A V T G T G I V A 207  
 623 GGA GCC AAC CTC TCT GGT GAT CTC AAG GAC CCT GCA GTT GCC ATT CCC 670  
 208 G A N L S G D L K D P A V A I P 223  
 671 AAG GGA ACA CTG CTG GCC ATC ATC ACC ACG TGC ATC ACC TAC ATC ATC 718  
 224 K G T L L A I I T C T I T G I Y I I 239  
 719 TAC CCC ATC ATG ATC GGG GCG TTT ACA CTG AGG GGA TGC TTC AA 762  
 240 Y P I M I G A F T L R G C F 253

**D** Na<sup>+</sup>/K<sup>+</sup>-ATPase α-subunit (AF548369)

1 ATG TGG TTC GAC AAC ACC ATT ATT GAA GCT GAC ACC TCT GAG GAT CAG 48  
 1 M W F D N T I I E A D T S E D Q 16  
 49 TCA GGC TGC CAG TAT GAC AAG AGC TCT GAA GGG TGG AAG ACC CTC TCC 96  
 17 S G C Q Y D K S S E G W K T L S 32  
 97 AGG ATC GCT GCT CTA TGC AAC CGT GCT GAG TTC AAA ACT GGC CAG GAA 144  
 33 R I A A L C N R A F K T G Q E 48  
 145 GAC GTT CCC ATC CTG AAA CGA GAG GTG AAC GGT GAT GCT TCT GAG GCA 192  
 49 D V P I L K R E V N G D A S E A 64  
 193 GCT CTG CTG AAG TGT GTG GAA CTG GCT GTT GGA GAT GTC AGG GGT TGG 240  
 65 A L L K C V E L A V G D V R G W 80  
 241 CGT ACC CGC AAC AAG AAG GTT TGT GAG ATT CCC TTC AAC TCC ACC AAC 288  
 81 R T R N K K V C E I P F N S T N 96  
 289 AAA TAT CAA GTG TCT ATC CAT GAG ACA CAG GAC AAG AAT GAT CCT CGC 336  
 97 K Y Q V S I H E T Q D K N D P R 112  
 337 TAC CTC CTC GTA ATG AAG GGT GCC CCT GAG AGA ATC CTT GAG CGA TGC 384  
 113 Y L L V M K G A P E R I L E R C 128  
 385 TCA ACC ATC TTC ATG AAT GGT GAG GAA AAG GCC CTG GAT GAG GAA ATG 432  
 129 S T I F M N G E E K A L D E E M 144  
 433 AAG GAA GCT TTC AAC AAT GCC TAC CTT GAG CTC GGA GGT CTT GGA GAG 480  
 145 K E A F N N A Y L E L G G L G E 160  
 481 CGT GTG CTG GGC TTC TGT GAC TAC ATG CTT CCC TCA GAC AAG TAT CCC 528  
 161 R V L G F C D Y M L P S D K Y P 176  
 529 CTG GGT TAT CCC TTT GAT ACT GAT TCT GTC AAT TTC CCT GTA CAC GGC 576  
 177 L Y F P F D T G T V N T F V R A H G 192  
 577 CTC AGG TTC GTC GGA CTC ATG TCC ATG ATT GAT CCT CCC CGT GCT GCT 624  
 193 L R F V G L M S M I D P P R A A 208  
 625 GTG CCT GAT GCT GTG GCC AAG TGC CGT TCT GCT GGT ATC AAG GTC ATC 672  
 209 V P D A V A K C R S A G I K V I 224  
 673 ATG GTC 678  
 225 M V 226

Fig. 2. Partial nucleotide and translated amino acid sequences of cDNAs amplified from *Chasmagnathus granulatus* gill, shown with identifications derived from BLASTX analysis. (A) arginine kinase; (B) V-type H<sup>+</sup>-ATPase B-subunit; (C) Na<sup>+</sup>/K<sup>+</sup>/2Cl<sup>-</sup> cotransporter; (D) Na<sup>+</sup>/K<sup>+</sup>-ATPase α-subunit. GenBank accession numbers are given in parentheses. Locations of primers used in quantitative PCR are indicated in blue.

**A Arginine kinase**

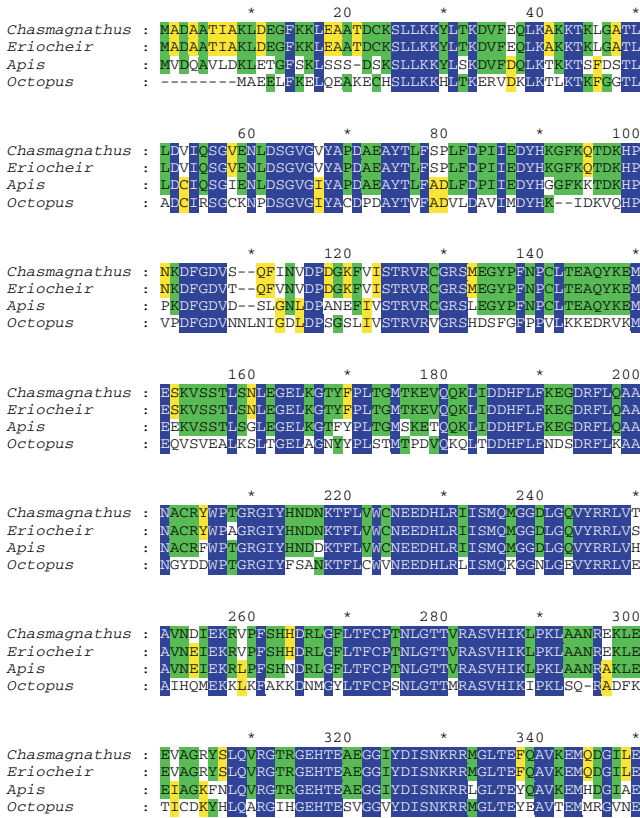

**B V-type H<sup>+</sup>-ATPase B-subunit**

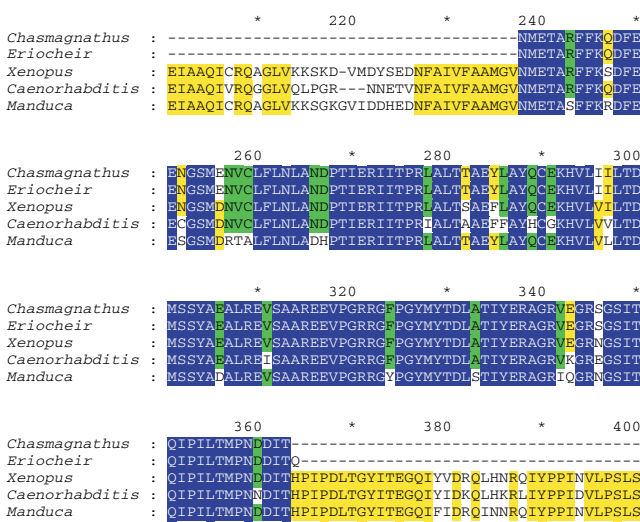

**C Na<sup>+</sup>/K<sup>+</sup>/2Cl<sup>-</sup> cotransporter**

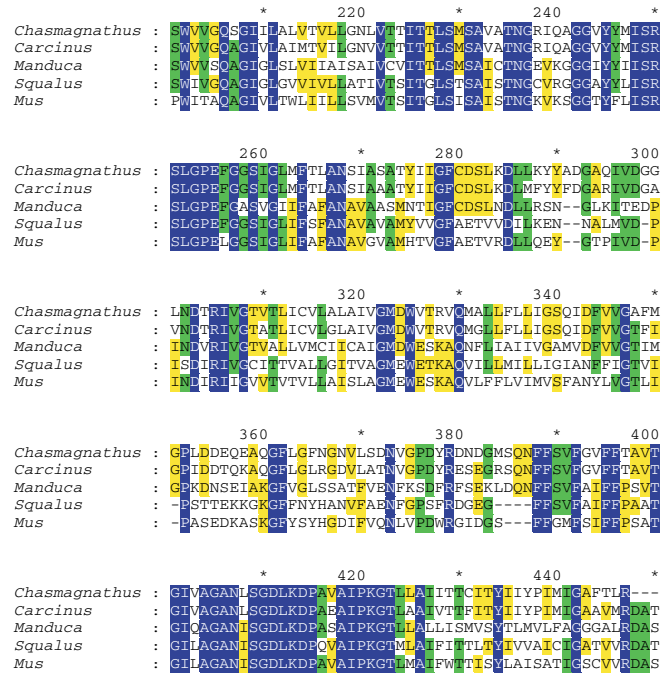

**D Na<sup>+</sup>/K<sup>+</sup>-ATPase α-subunit**

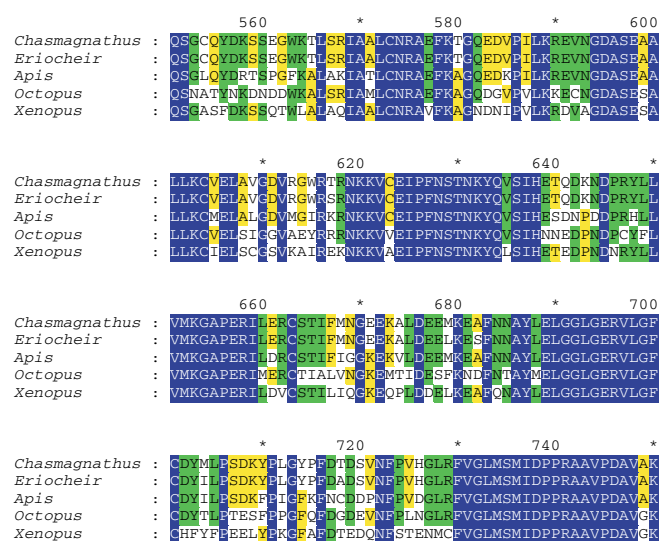

Fig. 3. Multiple alignment of translated amino acid sequences of transporter and housekeeping cDNAs from *Chasmagnathus granulatus* with corresponding fragments obtained from GenBank, indicated by species names and accession numbers. Blue background, 100% agreement; green background, 75–80% agreement, yellow background, 50–67% agreement. (A) Arginine kinase: *Chasmagnathus granulatus* (present study, AF233357), *Eriocheir sinensis* (AAF43437), *Apis mellifera* (AF023619), *Octopus vulgaris* (AB042331); (B) V-type H<sup>+</sup>-ATPase B-subunit: *Chasmagnathus granulatus* (present study, AF189783), *Eriocheir sinensis* (AAF08284), *Xenopus laevis* (AAH46738), *Caenorhabditis elegans* (AAF60418), *Manduca sexta* (AAS38817); (C) Na<sup>+</sup>/K<sup>+</sup>/2Cl<sup>-</sup> cotransporter: *Chasmagnathus granulatus* (present study, AF548368), *Carcinus maenas* (AAG62044), *Manduca sexta* (AAA75600), *Squalus acanthias* (AAM74966), *Mus musculus* (AAH38612); (D) Na<sup>+</sup>/K<sup>+</sup>-ATPase α-subunit: *Chasmagnathus granulatus* (present study, AF548369), *Eriocheir sinensis* (AAG39936), *Apis mellifera* (XP\_392363), *Octopus rubescens* (AAQ72761), *Xenopus laevis* (AAH43743). Asterisks indicate position markers between the numbered sites.

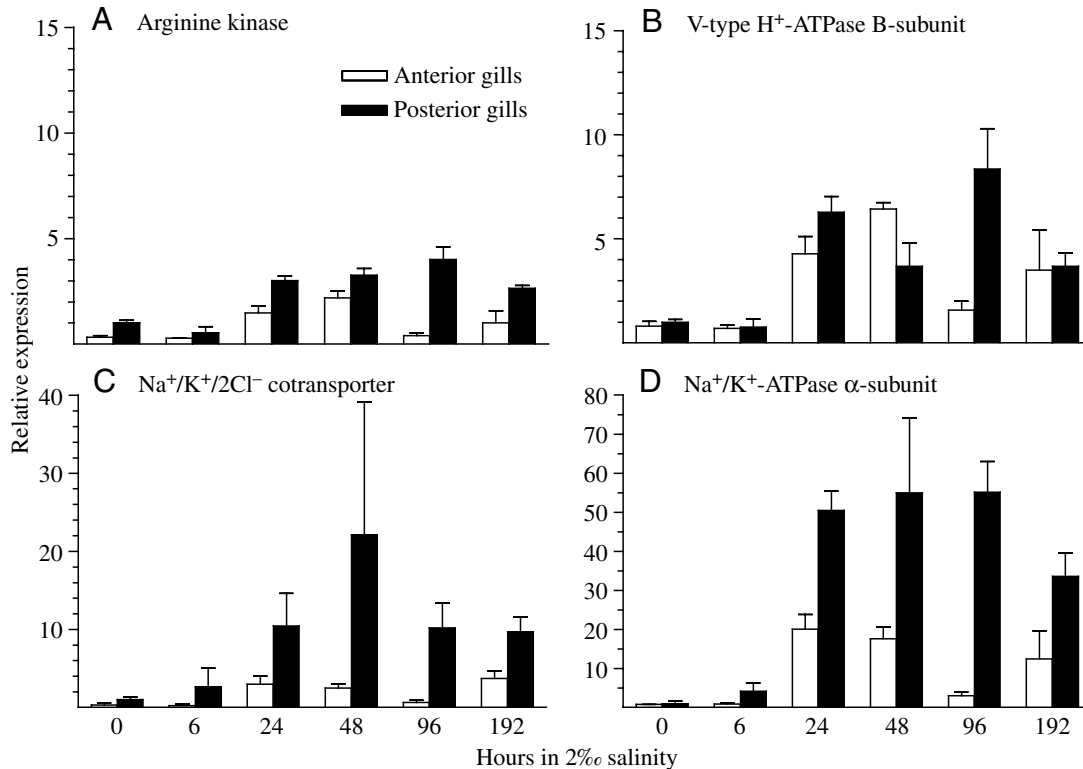

Fig. 4. Quantitative PCR analysis of mRNA transcript abundance in anterior (3, 4, 5) and posterior (6, 7, 8) gills of *Chasmagnathus granulatus* following transfer from 30‰ salinity to 2‰, normalized to the mean of posterior gills from crabs acclimated to 30‰ seawater (zero-time value). (A) Arginine kinase; (B) V-type H<sup>+</sup>-ATPase B-subunit; (C) Na<sup>+</sup>/K<sup>+</sup>/2Cl<sup>-</sup> cotransporter; (D) Na<sup>+</sup>/K<sup>+</sup>-ATPase  $\alpha$ -subunit. Means and standard errors were calculated from gills 3, 4 and 5 (anterior) and gills 6, 7 and 8 (posterior), with triplicate determinations for each gill preparation. Results of statistical analysis by ANOVA and *post hoc* comparisons are presented in the text.

Na<sup>+</sup>/K<sup>+</sup>/2Cl<sup>-</sup> cotransporter, functioning to move NaCl from hemolymph into branchial epithelial cells, which would then excrete Na<sup>+</sup> or Cl<sup>-</sup> into the medium. Further work is required to distinguish between these possibilities.

The most dramatic change in transcript abundance was observed for the Na<sup>+</sup>/K<sup>+</sup>-ATPase  $\alpha$ -subunit. Between 6 h and 24 h following transfer from 30 to 2‰ salinity, the mRNA abundance for the  $\alpha$ -subunit reached maximum levels, an approximately 50-fold increase in posterior gills, and remained at those levels for at least 4 days. Anterior gills also showed large increases, as much as 20-fold higher than the 30‰

controls, beginning at 24 h. By contrast, major changes in Na<sup>+</sup>/K<sup>+</sup>-ATPase  $\alpha$ -subunit transcript quantity following transfer to 45‰ occurred only after 96 h of exposure, similar to the time frame observed for the Na<sup>+</sup>/K<sup>+</sup>/2Cl<sup>-</sup> cotransporter.

The Na<sup>+</sup>/K<sup>+</sup>-ATPase of crustacean gills is restricted to the basolateral membrane (Towle and Kays, 1986), where it can be inhibited in perfused gills by the specific inhibitor ouabain (Burnett and Towle, 1990). In *C. granulatus*, we have shown that ouabain produces a large decrease in the transepithelial potential in symmetrically perfused posterior gills, indicating that the Na<sup>+</sup>/K<sup>+</sup>-ATPase is essential in energizing transbranchial ion transport (Luquet et al., 2002b). A recent study from our laboratory showed that posterior gills 6, 7 and 8 of *C. granulatus* contain about 82% of the total gill Na<sup>+</sup>/K<sup>+</sup>-ATPase activity (Genovese et al., 2004), a finding that is reflected in the current study showing a substantially higher content of Na<sup>+</sup>/K<sup>+</sup>-ATPase-encoding mRNA in posterior gills compared with anterior gills.

However, measurements of Na<sup>+</sup>/K<sup>+</sup>-ATPase enzymatic activity have not shown large differences in *C. granulatus* gills in relation to acclimation salinity (Genovese et al., 2004). Homogenates of posterior gills from animals acclimated to 30 or 45‰ seawater exhibit approximately the same specific Na<sup>+</sup>/K<sup>+</sup>-ATPase activity, and animals acclimated to 10‰ show only a modest increase (Genovese

Table 2. Relative mRNA abundance in anterior gills (gills 3, 4 and 5) and posterior gills (gills 6, 7 and 8) of *Chasmagnathus granulatus* acclimated to 30‰ seawater, normalized to the level of arginine kinase mRNA in gill 6

| Encoded protein                                                 | Relative mRNA abundance |                 |
|-----------------------------------------------------------------|-------------------------|-----------------|
|                                                                 | Anterior gills          | Posterior gills |
| Arginine kinase                                                 | 0.2704±0.0218           | 0.8125±0.0686   |
| V-type H <sup>+</sup> -ATPase                                   | 0.0430±0.0047           | 1.6464±0.6713   |
| Na <sup>+</sup> /K <sup>+</sup> /2Cl <sup>-</sup> cotransporter | 0.0001±0.0000           | 0.0091±0.0002   |
| Na <sup>+</sup> /K <sup>+</sup> -ATPase                         | 0.0613±0.0055           | 0.2279±0.0311   |

Values are means  $\pm$  S.E.M. ( $N=3$ ).

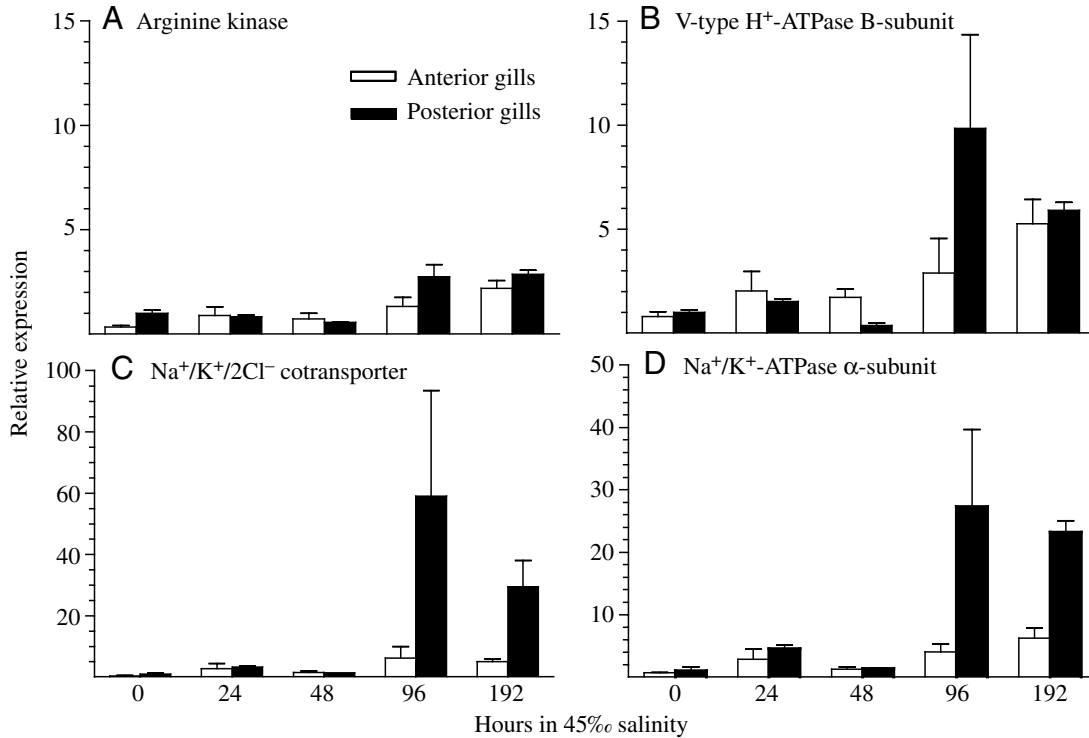

Fig. 5. Quantitative PCR analysis of mRNA transcript abundance in anterior (3, 4, 5) and posterior (6, 7, 8) gills of *Chasmagnathus granulatus* following transfer from 30‰ salinity to 45‰, normalized to the mean of posterior gills from crabs acclimated to 30‰ seawater (zero-time value). (A) Arginine kinase; (B) V-type H<sup>+</sup>-ATPase B-subunit; (C) Na<sup>+</sup>/K<sup>+</sup>/2Cl<sup>-</sup> cotransporter; (D) Na<sup>+</sup>/K<sup>+</sup>-ATPase α-subunit. Means and standard errors were calculated from gills 3, 4 and 5 (anterior) and gills 6, 7 and 8 (posterior), with triplicate determinations for each gill preparation. Results of statistical analysis by ANOVA and *post hoc* comparisons are presented in the text.

et al., 2004). The discrepancy between activity measurements and α-subunit mRNA abundance as detected by quantitative PCR requires explanation. It is known that catalytic activity of the Na<sup>+</sup>/K<sup>+</sup>-ATPase in other species may be modified by protein kinase A and protein kinase C, as well as by interaction with a regulatory γ-subunit (Therien and Blostein, 2000). In addition, access to the active site and/or the ouabain binding site in vesicular forms of the enzyme may not occur fully in assays employing homogenates without detergent treatment (Lucu and Flik, 1999). Hydrolytic activity measured *in vitro* may therefore not reflect accurately the functional rate of transport mediated by the Na<sup>+</sup>/K<sup>+</sup>-ATPase. Furthermore, transepithelial potential differences and <sup>22</sup>Na transport in posterior gills of crabs acclimated to 45‰ seawater are strongly inhibited by ouabain, suggesting that ion excretion through *C. granulatus* gills is indeed energized by Na<sup>+</sup>/K<sup>+</sup>-ATPase (Luquet et al., 2002b), a function that would be enhanced by the accumulation and translation of α-subunit mRNA. The large apparent increases in Na<sup>+</sup>/K<sup>+</sup>-ATPase α-subunit mRNA observed in this study may reflect a rapid turnover of Na<sup>+</sup>/K<sup>+</sup>-ATPase protein in gill plasma membranes of *C. granulatus*, requiring a high level of mRNA to support efficient replacement of the protein.

The rapid response of Na<sup>+</sup>/K<sup>+</sup>/2Cl<sup>-</sup> cotransporter and Na<sup>+</sup>/K<sup>+</sup>-ATPase α-subunit mRNA levels to salinity dilution,

compared with the relatively delayed response observed in hypersaline conditions, probably indicates the existence of distinctive regulatory mechanisms as well as transport geometry. In work in our laboratory with split gill lamellae from *C. granulatus* acclimated to 2‰ salinity (Onken et al., 2003), we have observed an almost complete inhibition of the short-circuit current both in Na<sup>+</sup>-free and Cl<sup>-</sup>-free medium, along with a strong inhibitory effect of apical CsCl (an inhibitor of K<sup>+</sup> channels). We have concluded that coupled electrogenic NaCl absorption is mediated by an apically located Na<sup>+</sup>/K<sup>+</sup>/2Cl<sup>-</sup> cotransporter in parallel with K<sup>+</sup> channels and is energized by Na<sup>+</sup>/K<sup>+</sup>-ATPase at the basolateral membrane. The dramatic induction of Na<sup>+</sup>/K<sup>+</sup>/2Cl<sup>-</sup> cotransporter and Na<sup>+</sup>/K<sup>+</sup>-ATPase gives further support to this hypothetical mechanism.

In recent unpublished experiments, we have changed the perfusion conditions to hypo-osmotic and found an Na<sup>+</sup>-independent transepithelial potential difference that is inhibited by the V-type H<sup>+</sup>-ATPase inhibitor bafilomycin (G. Genovese and C. M. Luquet, unpublished). These preliminary data support a role for the V-type H<sup>+</sup>-ATPase in ion uptake from extremely dilute salinity (2‰), supported by the modest increase in V-type H<sup>+</sup>-ATPase mRNA measured in the present study.

The induction of the three candidate transporters after



acclimation to high salinity makes us speculate that they are intimately involved in ion excretion across the gill. The current model of NaCl excretion in marine fishes includes a basolateral Na<sup>+</sup>/K<sup>+</sup>/2Cl<sup>-</sup> cotransporter that mediates the flux of Cl<sup>-</sup> from the blood to the cytosol of the ion-transporting cell, energized by the Na<sup>+</sup>/K<sup>+</sup>-ATPase (Evans, 2002). In this model, Cl<sup>-</sup> leaves the cell through an apical channel, possibly the cystic fibrosis transmembrane regulator protein (Singer et al., 1998). This Cl<sup>-</sup> flux generates an outside negative potential difference, which is believed to drive Na<sup>+</sup> through a paracellular route. Our electrophysiological and ion flux studies performed on isolated perfused gills of *C. granulatus* support the involvement of Na<sup>+</sup>/K<sup>+</sup>-ATPase. However, in most experiments we have recorded an outside positive potential difference, suggesting that Na<sup>+</sup> and not Cl<sup>-</sup> is actively transported (Luquet et al., 2002b). Thus, further studies using split gill lamellae mounted in an Ussing chamber remain to be carried out in order to propose an ion excretion model for crab gill.

Three levels of response to salinity change have been observed in the gills of euryhaline crabs: rapid, over a period of minutes; moderately rapid, over a period of hours; and slow, over a period of days. The most rapid responses probably involve protein phosphorylation and/or recruitment of membrane proteins from intracellular stores (Halperin et al., 2004). The slowest responses appear to include structural remodeling of the gill epithelium associated with cellular differentiation (Genovese et al., 2000; Luquet et al., 2002a). It is clear that the responses noted here are in the order of hours to days, providing an intermediate time scale of regulation associated with a complex pattern of specific transcriptional events.

This work was supported by the National Science Foundation (DBI-0100394 and INT-0305484), University of Buenos Aires (UBACYT X222) and a New Investigator Award from Mount Desert Island Biological Laboratory.

## References

- Altschul, S. F., Madden, T. L., Schaffer, A. A., Zhang, J., Zhang, Z., Miller, W. and Lipman, D. J. (1997). Gapped BLAST and PSI-BLAST: a new generation of protein database search programs. *Nucleic Acids Res.* **25**, 3389-3402.
- Burnett, L. E. and Towle, D. W. (1990). Sodium ion uptake by perfused gills of the blue crab *Callinectes sapidus*: Effects of ouabain and amiloride. *J. Exp. Biol.* **149**, 293-305.
- Bustin, S. A. (2002). Quantification of mRNA using real-time reverse transcription PCR (RT-PCR): trends and problems. *J. Mol. Endocrinol.* **29**, 23-39.
- Charmantier, G., Giménez, L., Charmantier-Daures, M. and Anger, K. (2002). Ontogeny of osmoregulation, physiological plasticity and larval export strategy in the grapsid crab *Chasmagnathus granulata* (Crustacea, Decapoda). *Mar. Ecol. Prog. Ser.* **229**, 185-194.
- Chomczynski, P. and Sacchi, N. (1987). Single-step method of RNA isolation by acid guanidinium thiocyanate-phenol-chloroform extraction. *Anal. Biochem.* **162**, 156-159.
- Corpet, F. (1988). Multiple sequence alignment with hierarchical clustering. *Nucleic Acids Res.* **16**, 10881-10890.
- Drach, P. and Tchernigovtzeff, C. (1967). Sur la méthode de détermination des stades d'intermue et son application générale aux Crustacés. *Vie Milieu* **18A**, 595-609.
- Ellington, W. R. (2001). Evolution and physiological roles of phosphagen systems. *Ann. Rev. Physiol.* **63**, 289-325.
- Evans, D. H. (2002). Cell signaling and ion transport across the fish gill epithelium. *J. Exp. Zool.* **293**, 336-347.
- Genovese, G., Luquet, C. M., Paz, D. A., Rosa, G. A. and Pellerano, G. N. (2000). The morphometric changes in the gills of the estuarine crab *Chasmagnathus granulatus* under hyper- and hyporegulation conditions are not caused by proliferation of specialised cells. *J. Anat.* **197**, 239-246.
- Genovese, G., Luchetti, C. G. and Luquet, C. M. (2004). Na<sup>+</sup>/K<sup>+</sup>-ATPase activity and gill ultrastructure in the hyper-hypo-regulating crab *Chasmagnathus granulatus* acclimated to dilute, normal, and concentrated seawater. *Mar. Biol.* **144**, 111-118.
- Halperin, J., Genovese, G., Tresguerres, M. and Luquet, C. M. (2004). Modulation of ion uptake across posterior gills of the crab *Chasmagnathus granulatus* by dopamine and cAMP. *Comp. Biochem. Physiol. A* **139**, 103-109.
- Kotlyar, S., Weihrauch, D., Paulsen, R. S. and Towle, D. W. (2000). Expression of arginine kinase enzymatic activity and mRNA in gills of the euryhaline crabs *Carcinus maenas* and *Callinectes sapidus*. *J. Exp. Biol.* **203**, 2395-2404.
- Lucu, Č. (1993). Ion transport in gill epithelium of aquatic Crustacea. *J. Exp. Zool.* **265**, 378-386.
- Lucu, Č. and Flik, G. (1999). Na<sup>+</sup>-K<sup>+</sup>-ATPase and Na<sup>+</sup>/Ca<sup>2+</sup> exchange activities in gills of hyperregulating *Carcinus maenas*. *Am. J. Physiol.* **276**, R490-R499.
- Lucu, Č. and Towle, D. W. (2003). Na<sup>+</sup>+K<sup>+</sup>-ATPase in gills of aquatic crustacea. *Comp. Biochem. Physiol. A* **135**, 195-214.
- Luquet, C. M., Ford, P., Rodriguez, E. M., Ansaldo, M. and Stella, V. (1992). Ionic regulation patterns in two species of estuarine crabs. *Commun. Biol.* **10**, 315-325.
- Luquet, C. M., Rosa, G. A., Ferrari, C. C., Genovese, G. and Pellerano, G. N. (2000). Gill morphology of the intertidal estuarine crab *Chasmagnathus granulatus* Dana, 1851 (Decapoda, Grapsidae) in relation to habitat and respiratory habits. *Crustaceana* **73**, 53-67.
- Luquet, C. M., Genovese, G., Rosa, G. A. and Pellerano, G. N. (2002a). Ultrastructural changes in the gill epithelium of the crab *Chasmagnathus granulatus* (Decapoda: Grapsidae) in diluted and concentrated seawater. *Mar. Biol.* **141**, 753-760.
- Luquet, C. M., Postel, U., Halperin, J., Urcola, M. R., Marques, R. and Siebers, D. (2002b). Transepithelial potential differences and Na<sup>+</sup> flux in isolated perfused gills of the crab *Chasmagnathus granulatus* (Grapsidae) acclimated to hyper- and hypo-salinity. *J. Exp. Biol.* **205**, 71-77.
- Luquet, C., Senek, M. and Towle, D. W. (2003). Na<sup>+</sup>/K<sup>+</sup>/2Cl<sup>-</sup> cotransporter and Na<sup>+</sup>K<sup>+</sup>-ATPase mRNA expression in the South American rainbow crab *Chasmagnathus granulatus* after acclimation to low and high salinity. *Bull. Mt. Desert Island Biol. Lab.* **42**, 63.
- Martínez, C. B., Harris, R. R. and Santos, M. C. (1998). Transepithelial potential differences and sodium fluxes in isolated perfused gills of the mangrove crab (*Ucides cordatus*). *Comp. Biochem. Physiol. A* **120**, 227-236.
- Mount, D. B., Delpire, E., Gamba, G., Hall, A. E., Poch, E., Hoover, R. S. and Hebert, S. C. (1998). The electroneutral cation-chloride cotransporters. *J. Exp. Biol.* **201**, 2091-2102.
- Onken, H. and Riestenpatt, S. (1998). NaCl absorption across split gill lamellae of hyperregulating crabs: Transport mechanisms and their regulation. *Comp. Biochem. Physiol. A* **119**, 883-893.
- Onken, H., Tresguerres, M. and Luquet, C. M. (2003). Active NaCl absorption across posterior gills of hyperosmoregulating *Chasmagnathus granulatus*. *J. Exp. Biol.* **206**, 1017-1023.
- Péqueux, A. (1995). Osmotic regulation in crustaceans. *J. Crust. Biol.* **15**, 1-60.
- Perry, S. F. (1997). The chloride cell: Structure and function in the gills of freshwater fishes. *Annu. Rev. Physiol.* **59**, 325-347.
- Riestenpatt, S., Onken, H. and Siebers, D. (1996). Active absorption of Na<sup>+</sup> and Cl<sup>-</sup> across the gill epithelium of the shore crab *Carcinus maenas*: voltage-clamp and ion-flux studies. *J. Exp. Biol.* **199**, 1545-1554.
- Schleich, C. E., Goldemberg, L. A. and López Mananes, A. A. (2001). Salinity dependent Na<sup>+</sup>-K<sup>+</sup>ATPase activity in gills of the euryhaline crab *Chasmagnathus granulata*. *Gen. Physiol. Biophys.* **20**, 255-266.
- Singer, T. D., Tucker, S. J., Marshall, W. S. and Higgins, C. F. (1998). A divergent CFTR homologue: highly regulated salt transport in the euryhaline teleost *F. heteroclitus*. *Am. J. Physiol.* **274**, C715-C723.
- Skinner, D. M. (1968). Isolation and characterization of ribosomal ribonucleic acid from the crustacean, *Gecarcinus lateralis*. *J. Exp. Zool.* **169**, 347-356.

- Taylor, H. H. and Taylor, E. W.** (1992). Gills and lungs: the exchange of gases and ions. In *Microscopic Anatomy of Invertebrates. Decapod Crustacea*, vol. 10 (ed. F. W. Harrison and A. G. Humes), pp. 203-293. New York: Wiley-Liss.
- Therien, A. G. and Blostein, R.** (2000). Mechanisms of sodium pump regulation. *Am. J. Physiol.* **279**, C541-C566.
- Towle, D. W. and Kays, W. T.** (1986). Basolateral localization of Na<sup>+</sup>+K<sup>+</sup>-ATPase in gill epithelium of two osmoregulating crabs, *Callinectes sapidus* and *Carcinus maenas*. *J. Exp. Zool.* **239**, 311-318.
- Towle, D. W. and Peppin, P.** (2002). Na<sup>+</sup>/K<sup>+</sup>/2Cl<sup>-</sup> cotransporter mRNA expression in the blue crab *Callinectes sapidus* measured by real-time quantitative PCR. *Bull. Mt. Desert Island Biol. Lab.* **41**, 17.
- Towle, D. W. and Weihrauch, D.** (2001). Osmoregulation by gills of euryhaline crabs: Molecular analysis of transporters. *Am. Zool.* **41**, 770-780.
- Towle, D. W., Rushton, M. E., Heidysch, D., Magnani, J. J., Rose, M. J., Amstutz, A., Jordan, M. K., Shearer, D. W. and Wu, W. S.** (1997a). Sodium-proton antiporter in the euryhaline crab *Carcinus maenas*: Molecular cloning, expression and tissue distribution. *J. Exp. Biol.* **200**, 1003-1014.
- Towle, D. W., Weihrauch, D., Fooks, A. and Cohen, Z. S.** (1997b). Molecular identification and cDNA sequencing of a Na<sup>+</sup>/K<sup>+</sup>/2Cl<sup>-</sup> cotransporter in gills of the euryhaline blue crab *Callinectes sapidus*. *Am. Zool.* **37**, 87A.
- Towle, D. W., Paulsen, R. S., Weihrauch, D., Kordylewski, M., Salvador, C., Lignot, J.-H. and Spanings-Pierrot, C.** (2001). Na<sup>+</sup>+K<sup>+</sup>-ATPase in gills of the blue crab *Callinectes sapidus*: cDNA sequencing and salinity-related expression of  $\alpha$ -subunit mRNA and protein. *J. Exp. Biol.* **204**, 4005-4012.
- Tresguerres, M., Onken, H., Perez, A. F. and Luquet, C. M.** (2003). Electrophysiology of posterior, NaCl-absorbing gills of *Chasmagnathus granulatus*: rapid responses to osmotic variations. *J. Exp. Biol.* **206**, 619-626.
- Weihrauch, D., Ziegler, A., Siebers, D. and Towle, D. W.** (2001). Molecular characterization of V-type H<sup>+</sup>-ATPase (B-subunit) in gills of euryhaline crabs and its physiological role in osmoregulatory ion uptake. *J. Exp. Biol.* **204**, 25-37.
- Weihrauch, D., Ziegler, A., Siebers, D. and Towle, D. W.** (2002). Active ammonia excretion across the gills of the green shore crab *Carcinus maenas*: participation of Na<sup>+</sup>/K<sup>+</sup>-ATPase, V-type H<sup>+</sup>-ATPase and functional microtubules. *J. Exp. Biol.* **205**, 2765-2775.
- Weihrauch, D., Morris, S. and Towle, D. W.** (2004). Ammonia excretion in aquatic and terrestrial crabs. *J. Exp. Biol.* **207**, 4491-4504.
